# Supplementary material for: Antioxidative and Cardioprotective Effects of Schisandra chinensis Bee Pollen Extract on Isoprenaline-Induced Myocardial Infarction in Rats
Source: PubMed Central journal article supplement (PMC6472278; doi:10.3390/molecules24061090), 2019-03-20
Supplement: molecules-24-01090-s001.pdf [file molecules-24-01090-s001.pdf]

# Antioxidative and Cardioprotective Effects of *Schisandra chinensis* Bee Pollen Extract on Isoprenaline-Induced Myocardial Infarction in Rats

Zhenhuang Shen <sup>1,2,3</sup>, Qianqian Geng <sup>1,3</sup>, Haibo Huang <sup>1,2,3</sup>, Hong Yao <sup>4</sup>, Tianyu Du <sup>1,2,3</sup>, Lifu Chen <sup>1,3</sup>, Zhenhong Wu <sup>1,3</sup>, Xiaoqing Miao <sup>1,3,\*</sup> and Peiyong Shi <sup>1,3,\*</sup>

- <sup>1</sup> Bee Science College, Fujian Agriculture and Forestry University, Fuzhou 350002, China; 18065021034@163.com (Z.S.); qqgengfafu@163.com (Q.G.); haibohuang329@163.com (H.H.); tianyu1988339@sina.com (T.D.); clfbee@126.com (L.C.); wzh516@126.com (Z.W.)  
<sup>2</sup> College of Food Science, Fujian Agriculture and Forestry University, Fuzhou 350002, China  
<sup>3</sup> State and Local Joint Engineering Laboratory of Natural Biotoxins, Fujian Agriculture and Forestry University, Fuzhou 350002, China  
<sup>4</sup> Department of Pharmaceutical Analysis, School of Pharmacy, Fujian Medical University, Fuzhou 350122, China; yauhung@126.com  
\* Correspondence: mxqsf88@126.com (X.M.); peiyshi@fafu.edu.cn (P.S.); Tel.: +86-591-8378-9482 (P.S.)

## Uridine identification

UV  $\lambda_{\max}$ : 205, 262 nm. (-)ESI/TOF-MS  $m/z$  243.06245 [M-H]<sup>-</sup>. <sup>1</sup>H-NMR (CD<sub>3</sub>OD, 400 MHz)  $\delta$  ppm: 8.080 (1H, d,  $J=6.4$  Hz, 6-H), 5.699 (1H, d,  $J=6.4$  Hz, 5-H), 5.898 (1H, d,  $J=4$  Hz, 1'-H), 4.146 (1H, dd,  $J=4, 4$  Hz, 2'-H), 4.179 (1H, dd,  $J=4, 4$  Hz, 3'-H), 4.099 (1H, m, 4'-H), 3.624 (2H, m, 5'-H). <sup>13</sup>C-NMR (CD<sub>3</sub>OD)  $\delta$  ppm: 164.8 (4-C), 151.1 (2-C), 141.3 (6-C), 101.3 (5-C), 89.3 (1'-C), 85.0 (4'-C), 73.5 (2'-C), 70.4 (3'-C), 61.5 (5'-C). The <sup>1</sup>H-NMR and <sup>13</sup>C-NMR profiles matched the reported NMR data for uridine [1-3].

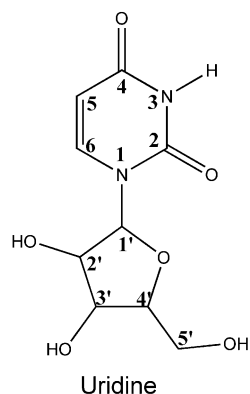

1. Ma, L.; Zhang, Y.; Dang, J. Chemical constituents from water extract of *Armillaria luteo-virens*. *J. China Pharm. Univ.* **2016**, *47*, 291-293. Doi: 10.11665/j.issn.1000-5048.20160307.
2. Lu, H.; Xie, H.; Yang Y.; Wei, X. Chemical constituents from the macroalga *Gracilaria lemaneiformis*. *J. Trop. Subtrop. Bot.* **2011**, *19*, 166-170. Doi: 10.3969/j.issn.1005-3395.2011.02.011.
3. Mantsch, H.H.; Smith, I.C. Fourier-transformed <sup>13</sup>C NMR spectra of polyuridylic acid, uridine, and related nucleotides-the use of <sup>31</sup>POC<sup>13</sup>C couplings for conformational analysis. *Biochem. Biophys. Res. Commun.* **1972**, *46*, 808-815.
